# Supplementary material
Source: PubMed Central journal article supplement (PMC10527419)
Supplement: NIHMS1909281-supplement-1.pdf [file NIHMS1909281-supplement-1.pdf]

**Supplementary table 1.** Pay-for-Performance indicators and remuneration

| Indicator                 | Remuneration UAH (equivalent in USD) | Evaluation    |                                                                                               |
|---------------------------|--------------------------------------|---------------|-----------------------------------------------------------------------------------------------|
| Screening                 | 10 UAH (\$0.27)                      | PHQ-9         | Per number of patients screened                                                               |
| Diagnosis                 | 50 UAH (\$1.35)                      | MADRS         | Per number of patients diagnosed with moderate or severe depression                           |
| Prescription              | 100 UAH (\$2.69)                     | Patient chart | Per number of patients with moderate or severe depression started on antidepressant treatment |
| Treatment retention at 1m | 50 UAH (\$1.35)                      | MADRS+FIBSER  | Per number of patients with moderate or severe depression retained on treatment at 1 month    |
| Treatment retention at 2m | 50 UAH (\$1.35)                      | MADRS+FIBSER  | Per number of patients with moderate or severe depression retained on treatment at 2 months   |

|                           |                  |              |                                                                                             |
|---------------------------|------------------|--------------|---------------------------------------------------------------------------------------------|
| Treatment retention at 3m | 50 UAH (\$1.35)  | MADRS+FIBSER | Per number of patients with moderate or severe depression retained on treatment at 3 months |
| Treatment retention at 4m | 50 UAH (\$1.35)  | MADRS+FIBSER | Per number of patients with moderate or severe depression retained on treatment at 4 months |
| Treatment retention at 5m | 50 UAH (\$1.35)  | MADRS+FIBSER | Per number of patients with moderate or severe depression retained on treatment at 5 months |
| Treatment retention at 6m | 100 UAH (\$2.69) | MADRS+FIBSER | Per number of patients with moderate or severe depression retained on treatment at 6 months |

**Legend:** The indicators and payment structure were guided by a panel of opioid agonist therapy providers and international experts.

Abbreviations: UAH Ukrainian Hryvnia; PHQ-9 Patient Health Questionnaire 9, MADRS Montgomery-Asberg Depression Rating Scale, FIBSER Frequency Intensity Burden of Side Effects Rating
